# Supplementary material
Source: PubMed Central journal article supplement (PMC3394376)
Supplement: cn9000022_si_001.pdf [file cn9000022_si_001.pdf]

## Supporting Information:

**Figure S1**

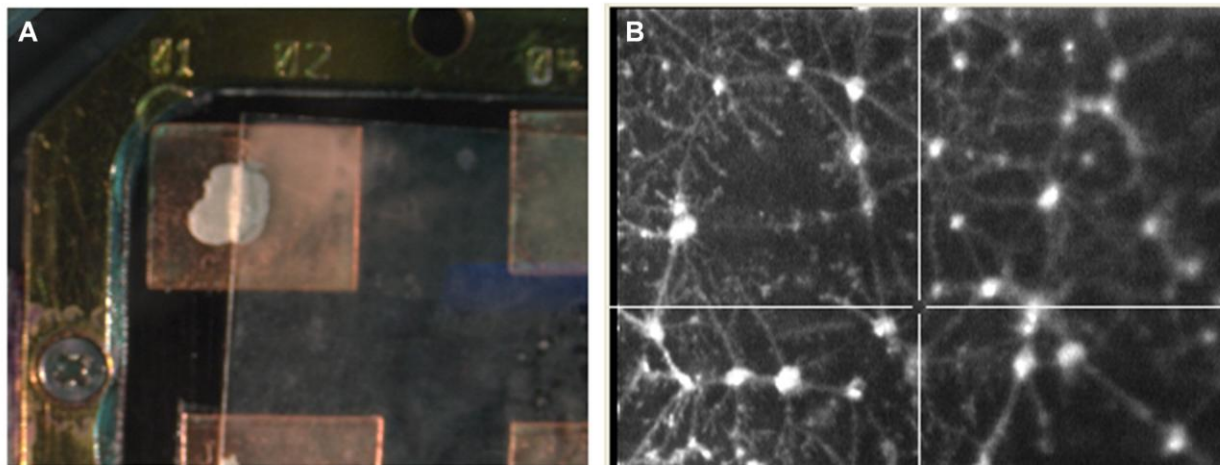

**Figure S1.** Mounted coverslip on MALDI target. **(A)** Coverslip was grounded with silver paint to prevent charging. **(B)** Image window as observed with the mass spectrometer used for guiding laser and sample analysis.
